# Supplementary material
Source: PubMed Central journal article supplement (PMC6201092)
Supplement: zac011187558s1.pdf [file zac011187558s1.pdf]

1 **Supplemental Figure 1:** Protein Kinase C inhibitor Gö6983 block ingenol-induced  
2 latency reversal in J-Lat 10.6

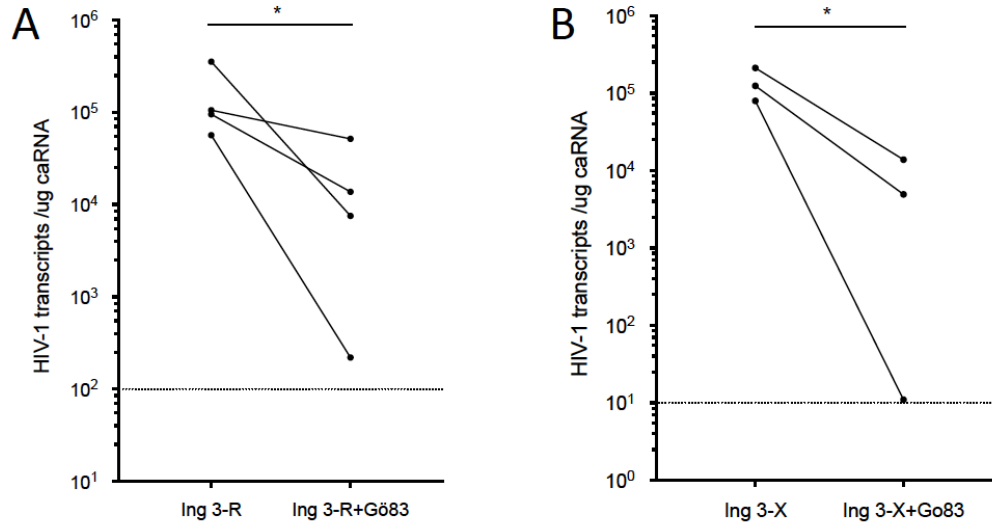

3  
4 Resting CD4<sup>+</sup> T cells from aviremic HIV-1-infected participants were exposed to Ing 3-R  
5 (**panel A**) or Ing 3-X (**panel B**) at 100nM with or without four-hour pre-exposure to the  
6 pan-PKC inhibitor Gö6983 at 300nM. PKC inhibition resulted in a statistically significant  
7 average decrease in latency reversal of five logs (quantified as cell-associated HIV-1  
8 RNA transcripts per ug of total cell-associated RNA) across a minimum of three  
9 independent experiments (Mann-Whitney test).

10

11

12

13 **Supplemental Figure 2: PKC Isoform Phosphorylation after Ingenol Exposure**

14

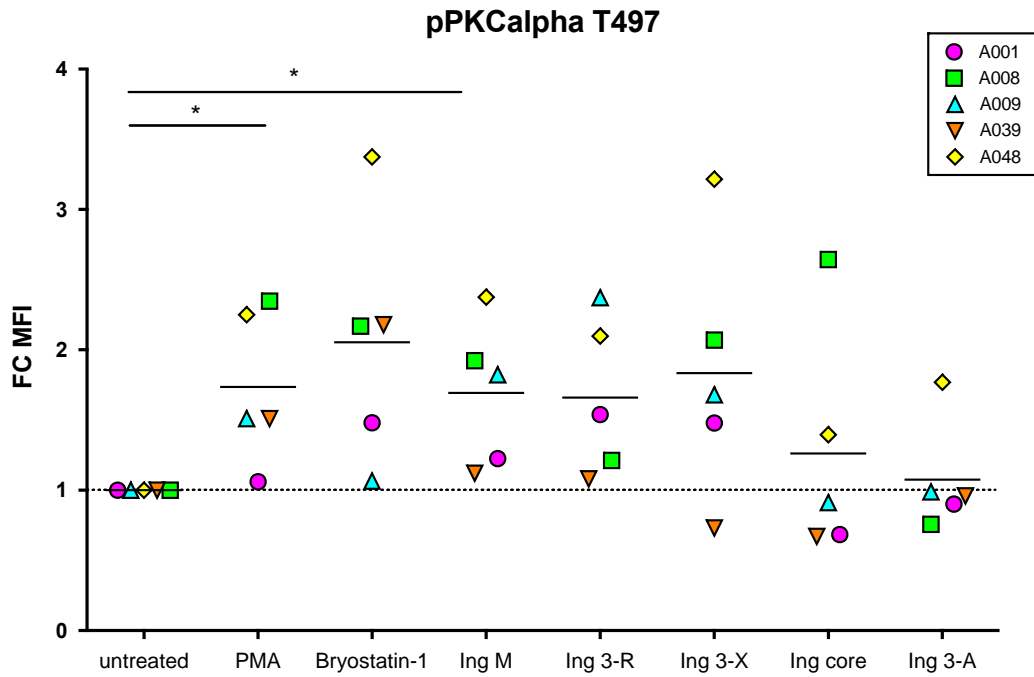

15

16

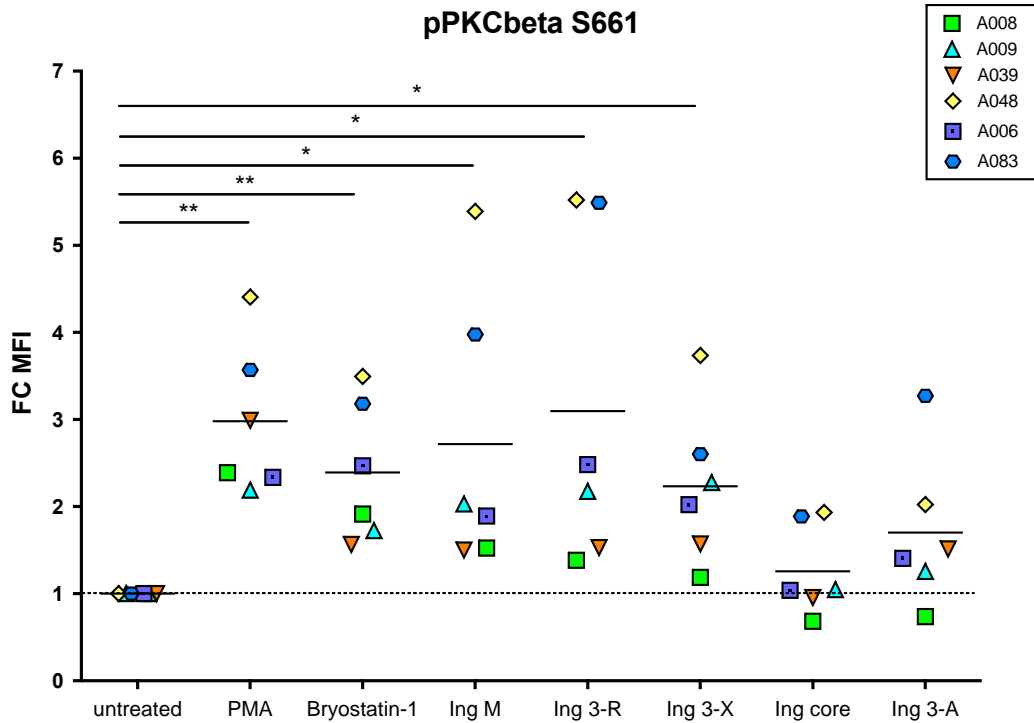

17

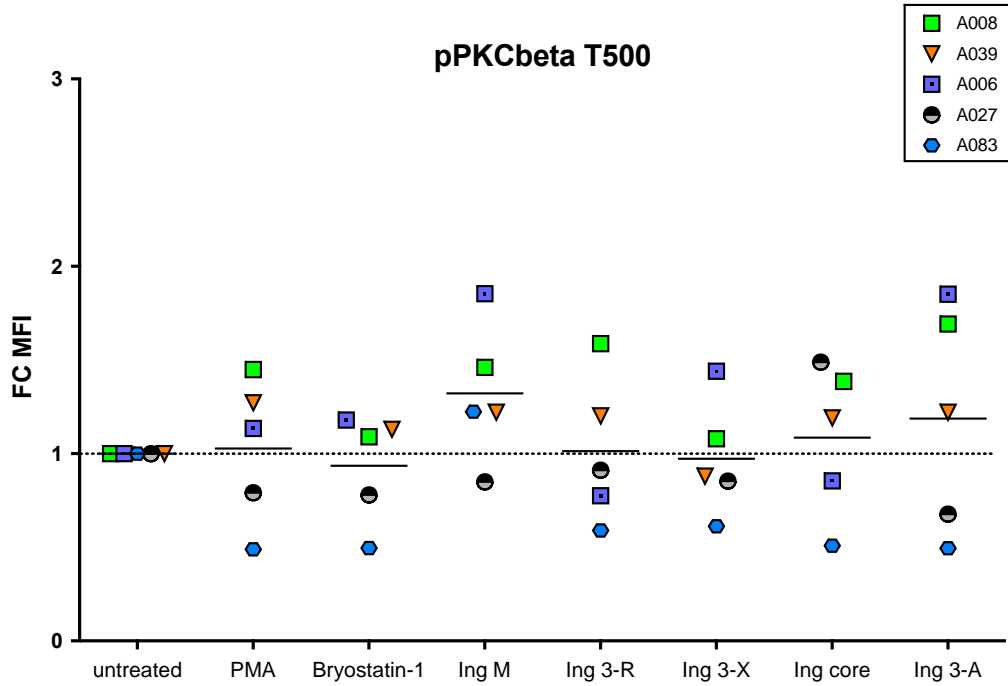

18

19

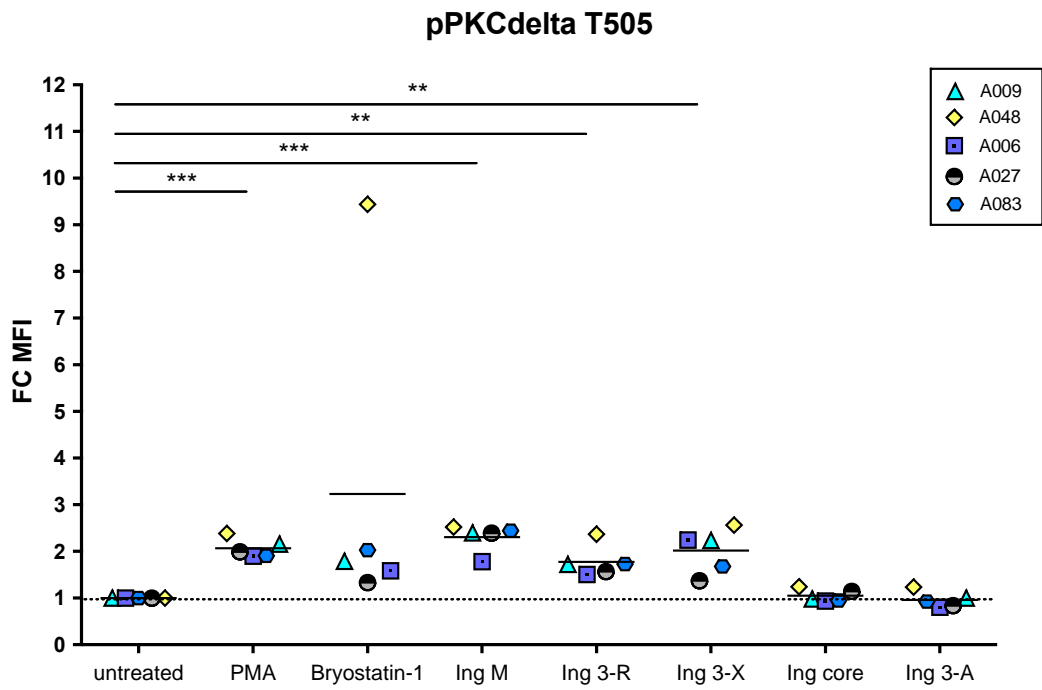

20

21

**pPKCdelta Y311**

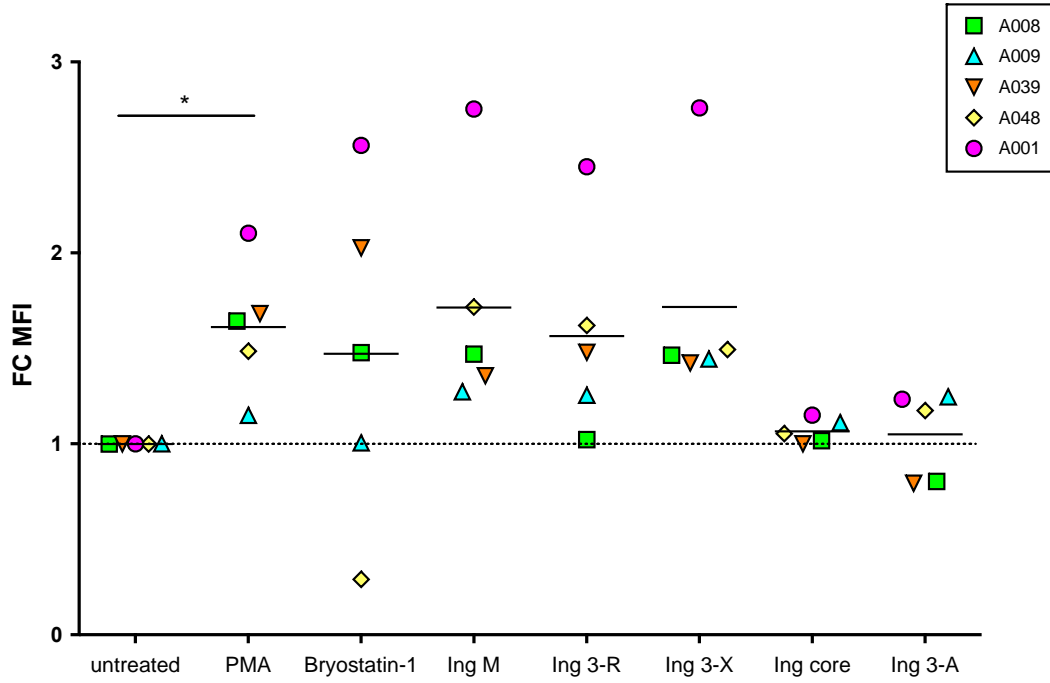

22

23

**pPKCtheta S695**

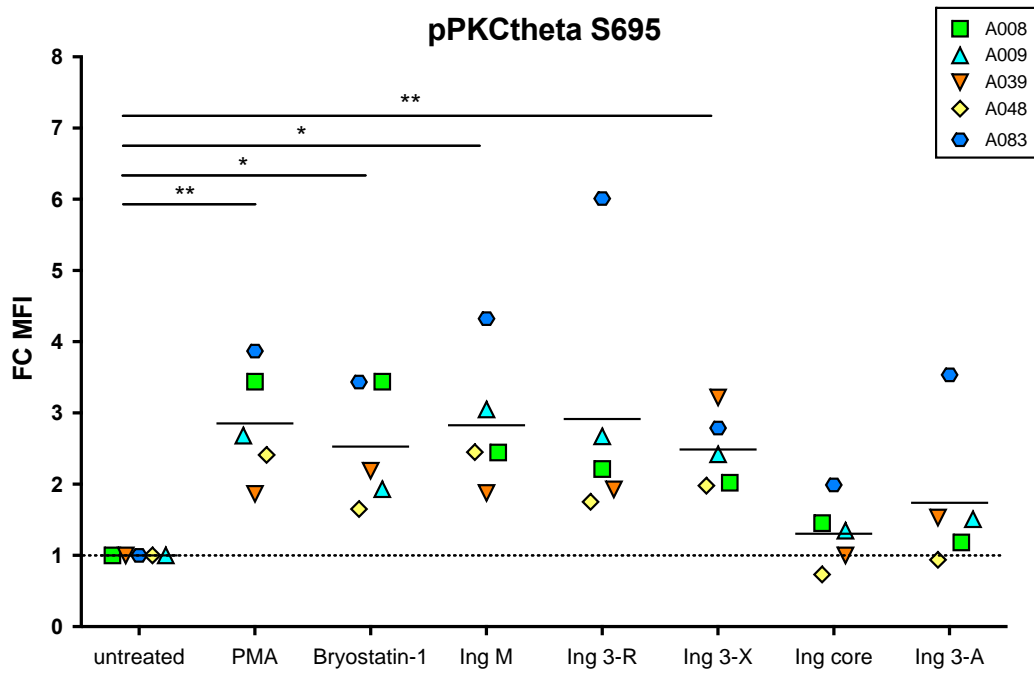

24

25

26

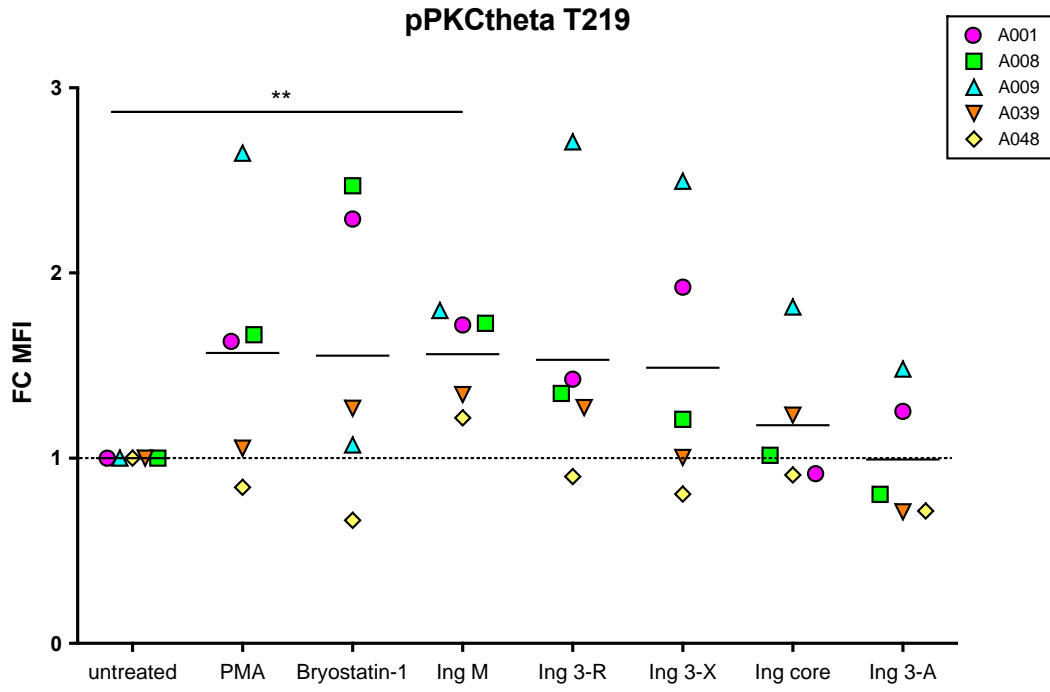

27

28

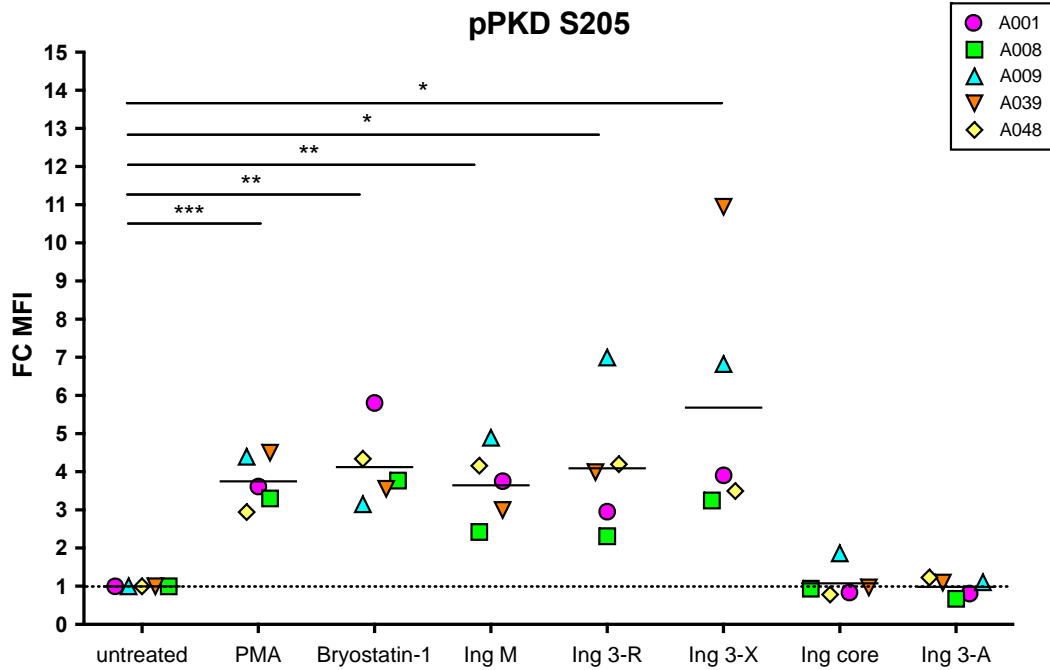

29

30

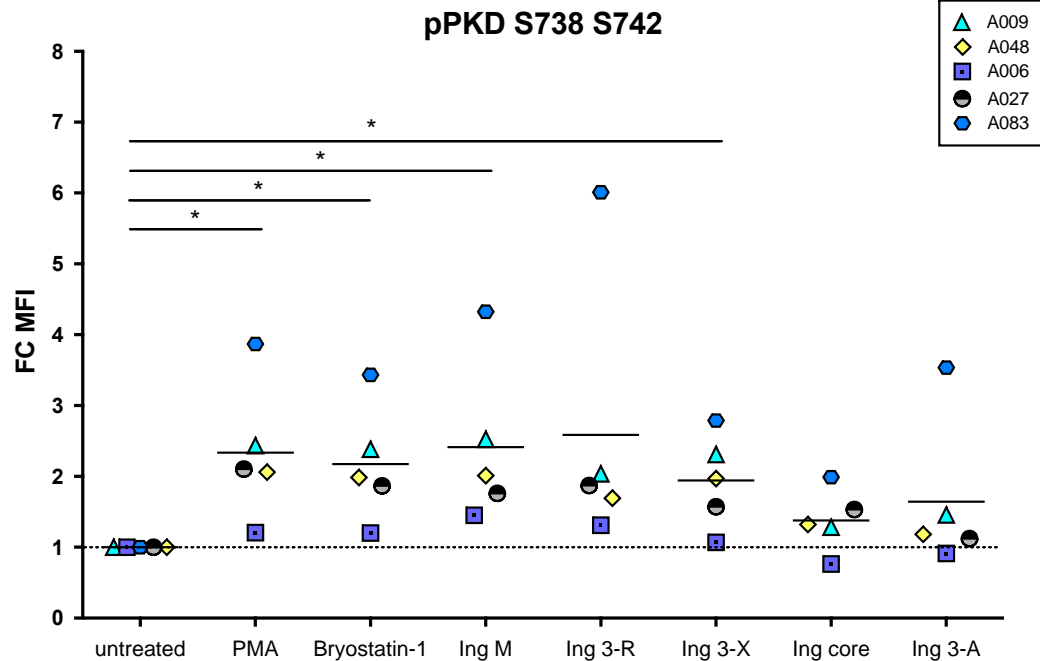

31

32

33 Resting primary CD4 cells isolated from HIV-1-uninfected participants (n=5) underwent  
 34 30-minute exposure to ingenol derivatives (100nM), Bryostatin-1 (100nM), or PMA (10  
 35 ng/mL). Cells underwent intracellular staining with anti-pPKC antibodies and were  
 36 analyzed by flow cytometry. Changes in PKC isoform phosphorylation are represented  
 37 as fold-change in mean fluorescence intensity (FC MFI) above untreated (negative)  
 38 control cell cultures. Ingenol core and Ing 3-A, which have little to no latency reversal  
 39 activity, did not induce any PKC isoform phosphorylation. Highly active ingenol  
 40 derivatives Ing M, Ing 3-R, and Ing 3-X significantly induced phosphorylation of PKC  
 41 isoforms PKC $\beta$ , PKC $\delta$ , PKC $\theta$ , and PKD protein. This PKC isoform phosphorylation  
 42 pattern did not significantly differ among these ingenols or structurally distinct PKC  
 43 agonists PMA or Bryostatin-1. Statistical significance was assessed using two-tailed  
 44 paired student t-test with  $p < 0.05$  (\*),  $p < 0.01$  (\*\*),  $p < 0.001$  (\*\*\*)).

45



47 **Supplemental Figure 3: Primary rCD4<sup>+</sup> T Cell Viability After Ingenol Exposure**

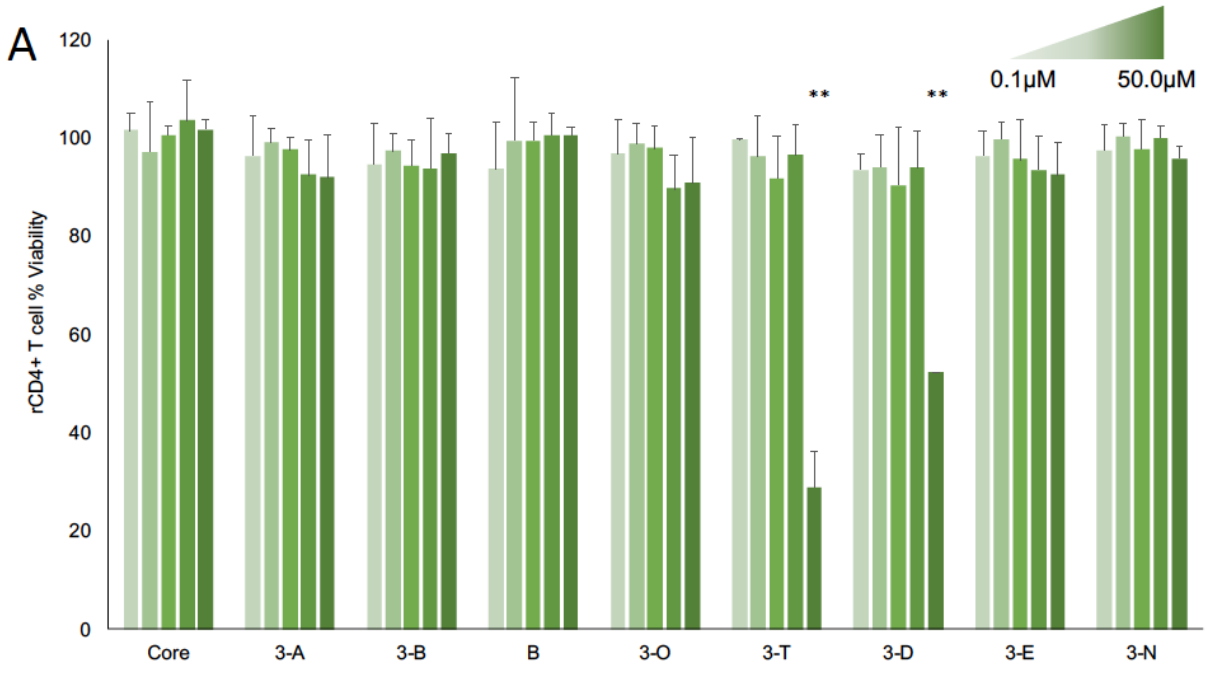

48

49

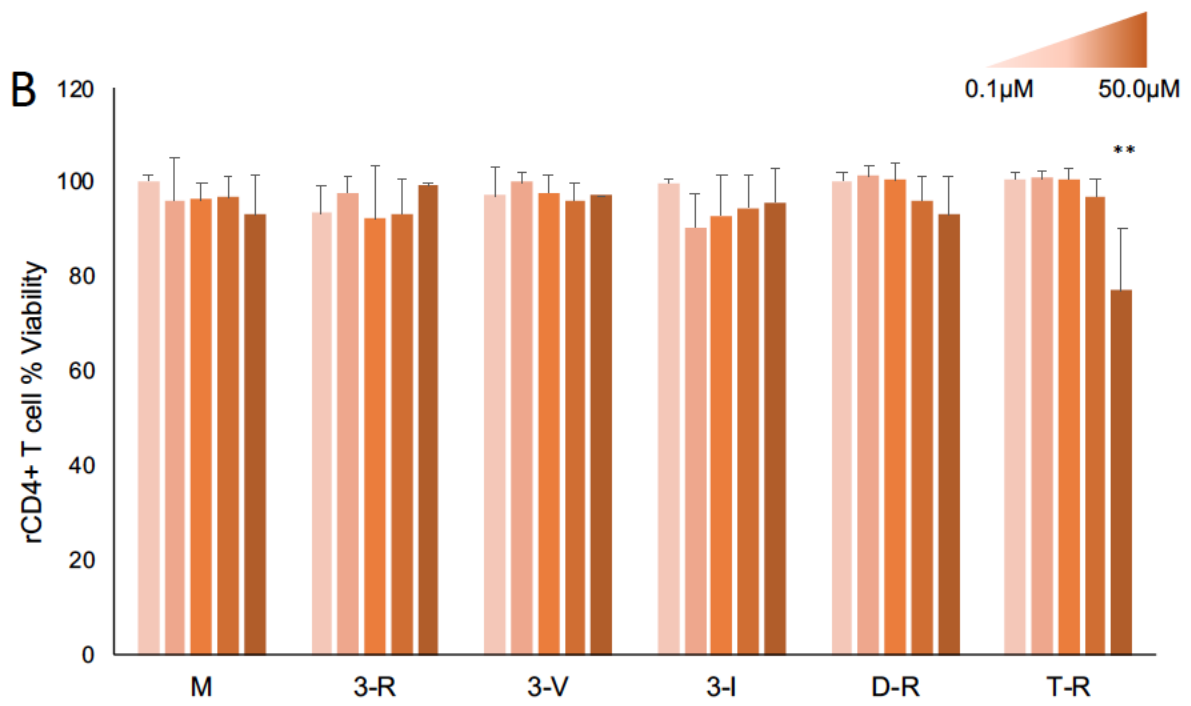

50

51



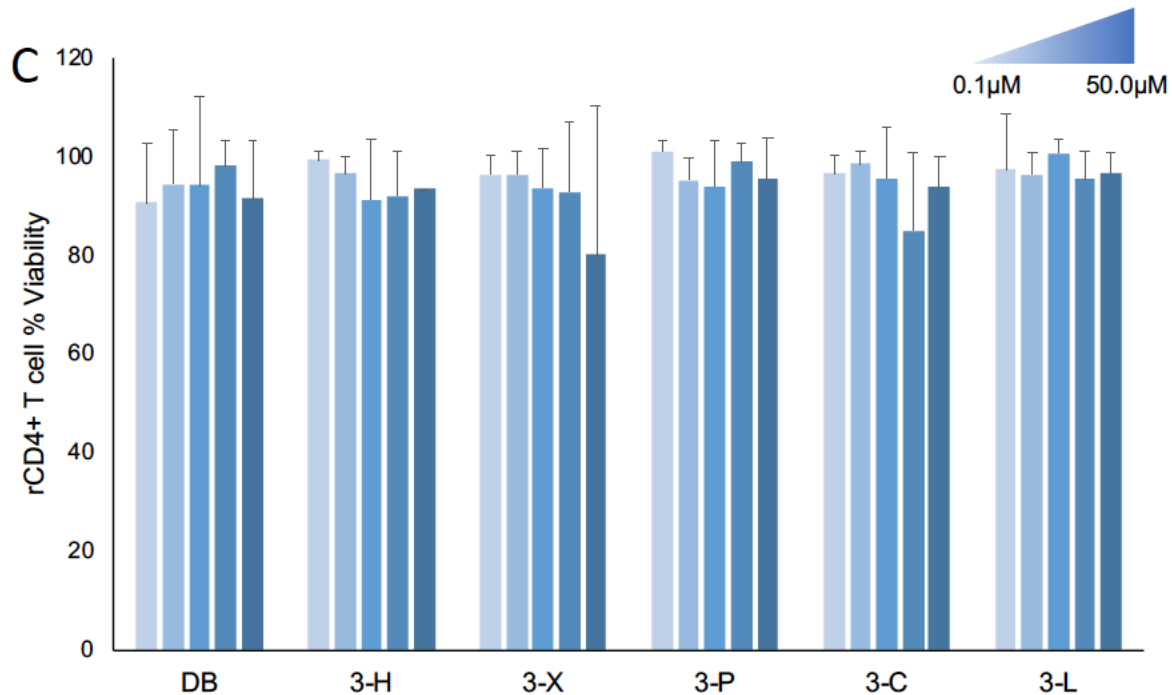

52

53 Resting CD4<sup>+</sup> T cells from aviremic HIV-1-positive participants (n=3) were exposed to  
 54 linear, branched and cyclical ingenol-3-esters (**panels A, B and C** respectively) for 48  
 55 hours at concentrations ranging from 100nM to 50,000nM. Cell membrane permeability  
 56 was determined by flow cytometry to quantify cytotoxicity induced by ingenol derivatives  
 57 relative to medium-alone controls (set at 100% for each independent experiment). Color  
 58 bars represent mean percentage of viable cells relative to this negative control, with  
 59 standard deviation represented by error bars. No significant decrease in cellular viability  
 60 occurred with any ingenol at concentrations between 100nM and 10,000nM. Ingenol  
 61 derivatives 3-T, 3-D and T-R caused significant cell death at 50,000nM (unpaired T test,  
 62 P <0.005).

63

64 **Supplemental Figure 4:** Comparison of latency reversal efficacy between J-Lat 10.6  
65 and primary T cells

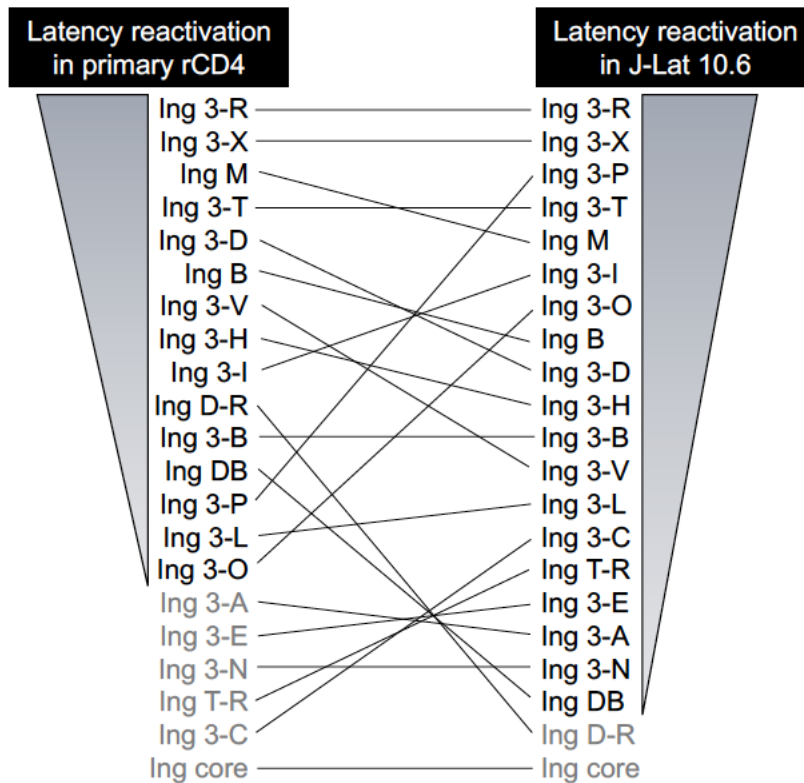

66  
67 Ingenol-3-esters are listed in order of decreasing latency reversing efficacy for primary  
68 resting CD4<sup>+</sup> T cells from aviremic participants (left) and J-Lat 10.6 cells (right). EC<sub>50</sub>  
69 was used to define relative efficacy for J-Lats (**Figures 1-3**). For primary resting CD4<sup>+</sup> T  
70 cells, mean fold change in cell-associated HIV-1 mRNA transcript frequency in ingenol-  
71 exposed cultures (40nM for 48 hours in vitro) compared to medium-alone (negative)  
72 control cultures across a minimum of three independent experiments determined  
73 efficacy. Ingenols in grey showed no activity across any experiment. Four of the top five  
74 ingenols in J-Lats are represented among the top five ingenols in primary cells.  
75 Similarly, high EC<sub>50</sub> values in J-Lats were predictive of minimal to no activity in primary  
76 cells.

## Supplemental Table: Participant Characteristics

| Participant | Age | Gender | Race / Ethnicity | CD4 <sup>+</sup> T Cell Count <sup>a</sup> | Duration of Viral Suppression <sup>b</sup> | ART Regimen  |
|-------------|-----|--------|------------------|--------------------------------------------|--------------------------------------------|--------------|
| H008        | 39  | M      | H                | 906                                        | 59                                         | TAF/FTC/EVGc |
| H015        | 55  | M      | C                | 839                                        | 72                                         | TAF/FTC/RAL  |
| H016        | 46  | M      | C                | 1,959                                      | 56                                         | TAF/FTC/RAL  |
| H020        | 57  | M      | C                | 702                                        | 76                                         | TAF/FTC/DRVr |
| H026        | 49  | M      | C                | 1,093                                      | 70                                         | ABC/3TC/DTG  |
| H031        | 58  | M      | C                | 677                                        | 38                                         | TAF/FTC/RAL  |
| H033        | 73  | M      | C                | 632                                        | 58                                         | ABC/3TC/DTG  |
| H043        | 49  | M      | C                | 464                                        | 47                                         | ABC/3TC/DTG  |
| H045        | 54  | M      | C                | 594                                        | 97                                         | TAF/FTC/DTG  |
| H052        | 54  | M      | C                | 281                                        | 13                                         | TAF/FTC/RAL  |
| H053        | 42  | M      | C                | 1047                                       | 30                                         | TAF/FTC/DTG  |
| H055        | 36  | M      | C                | 1,106                                      | 41                                         | TAF/FTC/DTG  |

**Abbreviations:** 3TC, lamivudine; ABC, abacavir; C, non-Hispanic Caucasian; DRVr, darunavir boosted with ritonavir; DTG, dolutegravir; EVGc, elvitegravir boosted with cobicistat; FTC, emtricitabine; H, Hispanic; RAL, raltegravir; TAF, tenofovir alafenamide; TDF, tenofovir disoproxil fumarate

<sup>a</sup> Absolute CD4<sup>+</sup> T cell count measured in cells/ $\mu$ L

<sup>b</sup> Consecutive months of documented viral load (plasma HIV-1 RNA) suppression below limit of clinical detection on ART
